# Supplementary material
Source: MDPI journal article supplement (https://www.mdpi.com/2073-4433/14/5/878)
Supplement: s1 [file s1]

## Supplementary Materials:

# Review on Source Profiles of Volatile Organic Compounds (VOCs) in Typical Industries in China

Shuangshuang Wang <sup>1</sup>, Jie Zhang <sup>2,\*</sup>, Yan Zhang <sup>2</sup>, Liwei Wang <sup>2</sup>, Zhongxue Sun <sup>1</sup> and Hailing Wang <sup>1,\*</sup>

<sup>1</sup> School of Environmental Science and Engineering, Nanjing Tech University, Nanjing 211800, China; 202061102004@njtech.edu.cn (S.W.); sunzzxxx@163.com (Z.S.)

<sup>2</sup> Jiangsu Province Engineering Research Center of Synergistic Control of Pollution and Carbon Emissions in Key Industries, Jiangsu Environmental Engineering Technology Co., Ltd., Nanjing 210019, China; zzzzyanhbjt@163.com (Y.Z.); wangliwei@163.com (L.W.)

\* Correspondence: zhangjhbjt@163.com (J.Z.); wanghailing@njtech.edu.cn (H.W.)

**Table S1.** The mass fraction of chemical groups of original profiles for petrochemical industry. (Unit: %)

| Profile name           | Location       | Data      | Sampling and analysis methods | No. samples | No. species | Percentage of chemical groups |         |           |             |       | Reference                       |
|------------------------|----------------|-----------|-------------------------------|-------------|-------------|-------------------------------|---------|-----------|-------------|-------|---------------------------------|
|                        |                |           |                               |             |             | Alkanes                       | Alkenes | Aromatics | Halocarbons | OVOCs |                                 |
| Petrochemical industry | Beijing        | -         | Canister-GC-MS/FID            | 5           | 56          | 56.78                         | 20.40   | 19.18     | 0.24        | 0.00  | Wei et al, 2014 <sup>[1]</sup>  |
| Petrochemical industry | YRD            | -         | Canister-GC-MS/FID            | 25          | 61          | 64.10                         | 21.00   | 9.30      | 5.00        | 0.00  | Mo et al, 2015 <sup>[2]</sup>   |
| Petrochemical industry | Northern China | -         | Canister-GC-MS/FID            | 5           | 85          | 55.59                         | 16.65   | 15.24     | 12.50       | 0.00  | Qi, 2018 <sup>[3]</sup>         |
| Petrochemical industry | Wuhan          | 2016–2017 | Canister-GC-MS/FID            | 6           | 72          | 69.79                         | 9.76    | 14.68     | 3.58        | 3.17  | Shen et al, 2018 <sup>[4]</sup> |
| Heating furnace        | Northern China | -         | Canister-GC-MS/FID            | 5           | 85          | 54.69                         | 14.06   | 31.25     | 0.00        | 0.00  | Qi, 2018 <sup>[3]</sup>         |
|                        | Wuhan          | 2016–2017 | Canister-GC-MS/FID            | 6           | 72          | 67.06                         | 6.82    | 22.73     | 2.84        | 0.57  | Shen et al, 2018 <sup>[4]</sup> |
| Catalytic cracking     | YRD            | -         | Canister-GC-MS/FID            | 25          | 61          | 64.47                         | 21.49   | 9.35      | 5.14        | 0.00  | Mo et al, 2015 <sup>[2]</sup>   |
|                        | Wuhan          | 2016–2017 | Canister-GC-MS/FID            | 6           | 72          | 82.75                         | 11.08   | 4.55      | 0.49        | 1.14  | Shen et al, 2018 <sup>[4]</sup> |
| Hydrocracking          | YRD            | -         | Canister-GC-MS/FID            | 25          | 61          | 86.79                         | 6.60    | 3.77      | 3.77        | 0.00  | Mo et al, 2015 <sup>[2]</sup>   |
|                        | Wuhan          | 2016–2017 | Canister-GC-MS/FID            | 6           | 72          | 71.44                         | 11.37   | 12.22     | 3.13        | 2.28  | Shen et al, 2018 <sup>[4]</sup> |
| Catalytic reforming    | YRD            | -         | Canister-GC-MS/FID            | 25          | 61          | 71.90                         | 5.14    | 21.97     | 1.87        | 0.00  | Mo et al, 2015 <sup>[2]</sup>   |
|                        | Northern China | -         | Canister-GC-MS/FID            | 5           | 85          | 50.00                         | 3.13    | 46.88     | 0.00        | 0.00  | Qi, 2018 <sup>[3]</sup>         |
| Delayed coking         | Wuhan          | 2016–2017 | Canister-GC-MS/FID            | 6           | 72          | 78.74                         | 3.98    | 13.92     | 3.41        | 0.00  | Shen et al, 2018 <sup>[4]</sup> |
|                        | YRD            | -         | Canister-GC-MS/FID            | 25          | 61          | 77.49                         | 2.34    | 17.76     | 2.80        | 0.00  | Mo et al, 2015 <sup>[2]</sup>   |
| Sulfur recovery        | Wuhan          | 2016–2017 | Canister-GC-MS/FID            | 6           | 72          | 39.09                         | 9.38    | 24.15     | 8.24        | 19.32 | Shen et al, 2018 <sup>[4]</sup> |
|                        | Northern China | -         | Canister-GC-MS/FID            | 5           | 85          | 81.94                         | 13.18   | 4.88      | 0.00        | 0.00  | Qi, 2018 <sup>[3]</sup>         |
| Oxidation pond         | YRD            | -         | Canister-GC-MS/FID            | 25          | 61          | 37.74                         | 28.30   | 8.49      | 25.47       | 0.00  | Mo et al, 2015 <sup>[2]</sup>   |
| Sewage                 | YRD            | -         | Canister-                     | 25          |             | 66.22                         | 25.23   | 6.55      | 2.80        | 0.00  | Mo et al, 2015 <sup>[2]</sup>   |

|                |                |           |                        |    |    |       |       |       |       |      |                                 |
|----------------|----------------|-----------|------------------------|----|----|-------|-------|-------|-------|------|---------------------------------|
| stripping      |                |           | GC-MS/FID              |    |    |       |       |       |       |      |                                 |
|                | YRD            | -         | Canister-<br>GC-MS/FID | 25 | 61 | 23.11 | 60.28 | 9.81  | 6.54  | 0.00 | Mo et al, 2015 <sup>[2]</sup>   |
| Gasoline tank  | Northern China | -         | Canister-<br>GC-MS/FID | 5  | 85 | 74.87 | 12.65 | 12.48 | 0.00  | 0.00 | Qi, 2018 <sup>[3]</sup>         |
|                | Wuhan          | 2016–2017 | Canister-<br>GC-MS/FID | 6  | 72 | 97.67 | 0.57  | 1.42  | 0.00  | 0.57 | Shen et al, 2018 <sup>[4]</sup> |
|                | YRD            | -         | Canister-<br>GC-MS/FID | 25 | 61 | 54.87 | 21.96 | 7.94  | 15.89 | 0.00 | Mo et al, 2015 <sup>[2]</sup>   |
| Diesel tank    | Northern China | -         | Canister-<br>GC-MS/FID | 5  | 85 | 52.38 | 3.81  | 43.81 | 0.00  | 0.00 | Qi, 2018 <sup>[3]</sup>         |
| Crude oil tank | Northern China | -         | Canister-<br>GC-MS/FID | 5  | 85 | 82.33 | 4.19  | 13.49 | 0.00  | 0.00 | Qi, 2018 <sup>[3]</sup>         |

**Table S2** The mass fraction of chemical groups of merged profiles for petrochemical industry.  
(Unit: %)

| Profile name           | Alkanes | Alkenes | Aromatic | Halocarbons | OVOCs |
|------------------------|---------|---------|----------|-------------|-------|
| Petrochemical industry | 60.58   | 16.68   | 14.37    | 5.24        | 3.12  |
| Heating furnace        | 59.84   | 10.27   | 26.53    | 2.80        | 0.56  |
| Catalytic cracking     | 73.03   | 16.16   | 6.89     | 2.79        | 1.13  |
| Hydrocracking          | 77.70   | 8.82    | 7.85     | 3.39        | 2.23  |
| Catalytic reforming    | 66.09   | 4.03    | 27.26    | 2.61        | 0.00  |
| Delayed coking         | 53.02   | 5.33    | 19.06    | 5.02        | 17.57 |
| Sulfur recovery        | 81.94   | 13.18   | 4.88     | 0.00        | 0.00  |
| Oxidation pond         | 37.74   | 28.30   | 8.49     | 25.47       | 0.00  |
| Sewage stripping       | 65.69   | 25.03   | 6.49     | 2.78        | 0.00  |
| Gasoline tank          | 64.28   | 24.15   | 7.79     | 3.22        | 0.56  |
| Diesel tank            | 49.53   | 11.90   | 23.90    | 14.67       | 0.00  |
| Crude oil tank         | 82.33   | 4.19    | 13.49    | 0.00        | 0.00  |

Table S3 The mass fraction of chemical groups of original profiles for industrial solvent-used industry. (Unit: %)

| Profile name          | Location       | Data | Sampling and analysis methods | No. samples | No. species | Percentage of chemical groups |         |           |             |       | Reference                         |
|-----------------------|----------------|------|-------------------------------|-------------|-------------|-------------------------------|---------|-----------|-------------|-------|-----------------------------------|
|                       |                |      |                               |             |             | alkanes                       | alkenes | aromatics | halocarbons | OVOCs |                                   |
| Gravure printing      | PRD            | 2010 | Canister-GC-MS                | 20          | 94          | 1.38                          | 0.01    | 10.79     | 0.06        | 87.76 | Yang et al, 2013 <sup>[5]</sup>   |
|                       | Nanjing        | -    | Bag-GC-MS                     | -           | 47          | 30.16                         | 15.71   | 4.29      | 12.30       | 36.01 | Xie et al, 2018 <sup>[6]</sup>    |
|                       | China          | -    | -                             | 4           | 212         | 28.09                         | 4.36    | 8.10      | 3.63        | 52.30 | Liang et al, 2020 <sup>[7]</sup>  |
| Lithographic printing | PRD            | 2010 | Canister-GC-MS                | 20          | 94          | 47.30                         | 5.37    | 23.97     | 1.59        | 21.78 | Yang et al, 2013 <sup>[5]</sup>   |
|                       | Nanjing        | -    | Bag-GC-MS                     | -           | 47          | 17.35                         | 5.00    | 3.26      | 11.75       | 57.75 | Xie et al, 2018 <sup>[6]</sup>    |
| Letterpress printing  | PRD            | 2010 | Canister-GC-MS                | 20          | 94          | 6.00                          | 0.04    | 19.33     | 4.08        | 8.29  | Yang et al, 2013 <sup>[5]</sup>   |
|                       | Nanjing        | -    | Bag-GC-MS                     | -           | 47          | 20.71                         | 3.07    | 1.57      | 19.97       | 50.95 | Xie et al, 2018 <sup>[6]</sup>    |
| Offset printing       | China          | -    | -                             | 4           | 212         | 32.88                         | 2.23    | 17.91     | 1.73        | 34.39 | Liang et al, 2020 <sup>[7]</sup>  |
| Dyeing                | PRD            | -    | Canister-GC-MS                | 16          | 52          | 3.09                          | 0.18    | 43.10     | 0.00        | 53.50 | Zhong et al, 2017 <sup>[8]</sup>  |
|                       | China          | -    | -                             | 4           | 212         | 0.00                          | 0.00    | 35.02     | 1.10        | 60.26 | Liang et al, 2020 <sup>[7]</sup>  |
|                       | Beijing        | -    | Canister-GC-MS/FID            | 22          | 106         | 0.58                          | 0.00    | 27.14     | 1.01        | 71.26 | Fang et al, 2019 <sup>[9]</sup>   |
| Automobile            | Southern China | -    | GC-MS                         | 11          | 120         | 12.43                         | 2.49    | 19.01     | 15.74       | 47.48 | Zhai et al, 2018 <sup>[10]</sup>  |
|                       | Southern China | -    | GC-MS                         | 11          | 120         | 4.68                          | 9.50    | 40.93     | 4.13        | 40.48 | Zhai et al, 2018 <sup>[10]</sup>  |
|                       | Beijing        | -    | Canister-GC-MS/FID            | 22          | 106         | 3.27                          | 0.18    | 84.10     | 4.47        | 7.86  | Fang et al, 2019 <sup>[9]</sup>   |
| Furniture             | PRD            | -    | Canister-GC-MS                | 16          | 52          | 7.01                          | 0.1     | 54.77     | 0.01        | 38.18 | Zhong et al, 2017 <sup>[8]</sup>  |
|                       | Beijing        | -    | Canister-GC-MS/FID            | 22          | 106         | 17.42                         | 0.32    | 18.98     | 8.18        | 55.08 | Fang et al, 2019 <sup>[9]</sup>   |
|                       | Zhengzhou      | -    | Bag-GC-MS                     | 4           | 104         | 0.30                          | 1.40    | 0.50      | 12.30       | 85.50 | Zhang et al, 2020 <sup>[11]</sup> |
|                       | PRD            | -    | Canister-GC-MS                | 16          | 52          | 13.10                         | 0.91    | 63.40     | 0.00        | 19.60 | Zhong et al, 2017 <sup>[8]</sup>  |
| Metal                 | PRD            | -    | Canister-GC-MA/FID            | -           | 63          | 10.28                         |         | 54.68     | 2.60        | 17.22 | Gao, 2015 <sup>[12]</sup>         |
|                       | -              | -    | -                             | -           | 139         | 8.89                          | 0.33    | 83.63     | 0.25        | 6.91  | Wu and Xie, 2017 <sup>[13]</sup>  |
|                       | Zhejiang       | 2018 | -                             | -           | -           | 0.00                          | 0.00    | 46.00     | 0.00        | 49.00 | Wang et al, 2020 <sup>[14]</sup>  |
| Shipping              | PRD            | -    | Canister-GC-MS                | 16          | 52          | 0.63                          | 0.00    | 91.60     | 0.00        | 7.56  | Zhong et al, 2017 <sup>[8]</sup>  |
|                       | PRD            | -    | Canister-GC-MA/FID            | -           | 63          | 0.00                          | 0.00    | 96.56     | 0.00        | 8.28  | Gao, 2015 <sup>[12]</sup>         |
|                       | China          | -    | -                             | 4           | 212         | 9.75                          | 0.43    | 82.99     | 0.00        | 0.00  | Liang et al, 2020 <sup>[7]</sup>  |
|                       | Zhejiang       | -    | -                             | -           | -           | 0.00                          | 0.00    | 56.00     | 0.00        | 44.00 | Teng et al, 2022 <sup>[15]</sup>  |
|                       | PRD            | -    | Canister-GC-MS, DNPH-HPLC     | 6           | -           | 20.17                         | 21.17   | 9.41      | 0.71        | 48.54 | Wang et al, 2020 <sup>[16]</sup>  |
|                       | PRD            | -    | Canister-GC-MS, DNPH-HPLC     | 6           | -           | 13.47                         | 15.25   | 6.06      | 2.00        | 63.22 | Wang et al, 2020 <sup>[16]</sup>  |
|                       | PRD            | -    | Canister-GC-MS, DNPH-HPLC     | 6           | -           | 5.56                          | 32.86   | 3.49      | 0.21        | 57.88 | Wang et al, 2020 <sup>[16]</sup>  |

|         |                |   |                              |    |     |       |       |       |       |       |                                     |
|---------|----------------|---|------------------------------|----|-----|-------|-------|-------|-------|-------|-------------------------------------|
| Plastic | PRD            | - | Canister-GC-MS,<br>DNPH-HPLC | 6  | -   | 9.91  | 24.31 | 5.70  | 1.71  | 58.37 | Wang et al,<br>2020 <sup>[16]</sup> |
|         | PRD            | - | Canister-GC-MS               | 16 | 52  | 14.60 | 0.25  | 39.40 | 0.00  | 45.60 | Zhong et al,<br>2017 <sup>[8]</sup> |
|         | China          | - | -                            | 4  | 212 | 28.00 | 0.00  | 37.50 | 0.00  | 11.00 | Liang et al,<br>2020 <sup>[7]</sup> |
|         | Zheng-<br>zhou | - | Bag-GC-MS                    | 4  | 104 | 21.13 | 3.48  | 28.87 | 17.28 | 29.14 | Zhang et<br>al,2020 <sup>[11]</sup> |

**Table S4** The mass fraction of chemical groups of merged profiles for industrial solvent-used industry. (Unit: %)

| <b>Profile name</b>    | <b>Alkanes</b> | <b>Alkenes</b> | <b>Aromatic</b> | <b>Halocarbons</b> | <b>OVOCs</b> |
|------------------------|----------------|----------------|-----------------|--------------------|--------------|
| Petrochemical industry | 60.58          | 16.68          | 14.37           | 5.24               | 3.12         |
| Gravure                | 19.88          | 6.69           | 7.73            | 5.33               | 58.69        |
| Lithographic           | 32.32          | 5.18           | 13.61           | 6.67               | 39.77        |
| Letterpress            | 13.36          | 1.56           | 10.45           | 12.03              | 29.62        |
| Offset                 | 32.88          | 2.23           | 17.91           | 1.73               | 34.39        |
| Dyeing                 | 3.09           | 0.18           | 39.06           | 1.10               | 56.88        |
| Auto-coating           | 6.505          | 1.245          | 23.075          | 8.375              | 59.37        |
| Auto-drying            | 3.975          | 4.84           | 62.515          | 4.3                | 24.17        |
| Auto-repairing         | 7.01           | 0.1            | 54.77           | 0.01               | 38.18        |
| Furniture              | 8.86           | 0.86           | 9.74            | 10.24              | 70.29        |
| Metal                  | 10.76          | 0.62           | 61.93           | 1.43               | 23.18        |
| Shipping               | 9.91           | 18.80          | 43.98           | 1.16               | 41.12        |
| Plastic                | 14.60          | 0.25           | 39.40           | 0.00               | 45.60        |
| Electronic             | 24.56          | 1.74           | 33.18           | 8.64               | 20.07        |

Table S5 The mass fraction of chemical groups of original profiles for chemical industry. (Unit: %)

| Profile name | Location | Data      | Sampling and analysis methods | No. samples | No. species | Percentage of chemical groups |         |           |             |       | Reference                         |
|--------------|----------|-----------|-------------------------------|-------------|-------------|-------------------------------|---------|-----------|-------------|-------|-----------------------------------|
|              |          |           |                               |             |             | alkanes                       | alkenes | aromatics | halocarbons | OVOCs |                                   |
| ETH          | -        | -         | -                             | -           | 139         | 21.09                         | 37.09   | 15.43     | 8.16        | 17.52 | Wu and Xie, 2017 <sup>[13]</sup>  |
| PRO          | -        | -         | -                             | -           | 139         | 21.09                         | 37.09   | 15.43     | 8.16        | 17.52 | Wu and Xie, 2017 <sup>[13]</sup>  |
| BEN          | -        | -         | -                             | -           | 139         | 0.00                          | 0.00    | 100.00    | 0.00        | 0.00  | Wu and Xie, 2017 <sup>[13]</sup>  |
| EBEN         | -        | -         | -                             | -           | 139         | 0.00                          | 0.00    | 100.00    | 0.00        | 0.00  | Wu and Xie, 2017 <sup>[13]</sup>  |
| BUT          | -        | -         | -                             | -           | 139         | 0.00                          | 50.00   | 0.00      | 0.00        | 0.00  | Wu and Xie, 2017 <sup>[13]</sup>  |
| STY          | -        | -         | -                             | -           | 139         | 0.00                          | 0.00    | 100.00    | 0.00        | 0.00  | Wu and Xie, 2017 <sup>[13]</sup>  |
| PVC          |          | 2018–2019 | Canister-GC-MS                | 148         | 107         | 11.32                         | 0.00    | 0.00      | 0.00        | 88.68 | Huang et al. 2021 <sup>[17]</sup> |
| PS           |          | 2018–2019 | Canister-GC-MS                | 148         | 107         | 2.91                          | 3.56    | 82.61     | 1.98        | 9.09  | Huang et al. 2021 <sup>[17]</sup> |
| PPG          | Jiangsu  | -         | Canister-GC-MS                | 6           | 7           | 0.10                          | 0.26    | 7.31      | 14.43       | 77.88 | Zhao et al. 2017 <sup>[18]</sup>  |
| PP           |          | 2018–2019 | Canister-GC-MS                | 148         | 107         | 32.98                         | 19.77   | 8.70      | 15.81       | 22.93 | Huang et al. 2021 <sup>[17]</sup> |
| PP           | YRD      | -         | Canister-GC-MS/FID            | 25          | 61          | 15.96                         | 56.48   | 5.09      | 22.46       | 0.00  | Mo et al. 2015 <sup>[2]</sup>     |
| PE           |          | 2018–2019 | Canister-GC-MS                | 148         | 107         | 44.82                         | 22.53   | 7.51      | 7.51        | 17.79 | Huang et al. 2021 <sup>[17]</sup> |
| SIS          | Jiangsu  | -         | Canister-GC-MS                | 6           | 12          | 85.79                         | 0.00    | 1.00      | 1.03        | 12.12 | Zhao et al. 2017 <sup>[18]</sup>  |
| SEBS         | Jiangsu  | -         | Canister-GC-MS                | 6           | 10          | 72.69                         | 0.00    | 1.92      | 2.65        | 22.69 | Zhao et al. 2017 <sup>[18]</sup>  |
| SBR          |          | 2018–2019 | Canister-GC-MS                | 148         | 107         | 49.72                         | 1.19    | 49.02     | 0.00        | 0.00  | Huang et al. 2021 <sup>[17]</sup> |
| SBR          | Jiangsu  | -         | Canister-GC-MS                | 6           | 12          | 69.90                         | 0.00    | 25.95     | 0.14        | 3.95  | Zhao et al. 2017 <sup>[18]</sup>  |
| ERP          | -        | 2018–2019 | Canister-GC-MS                | 148         | 107         | 21.63                         | 28.86   | 10.68     | 2.77        | 36.36 | Huang et al. 2021 <sup>[17]</sup> |
| EPDM         | -        | 2018–2019 | Canister-GC-MS                | 148         | 107         | 20.86                         | 9.09    | 7.91      | 46.25       | 9.09  | Huang et al. 2021 <sup>[17]</sup> |
| PU           | -        | 2018–2019 | Canister-GC-MS                | 148         | 107         | 9.36                          | 1.58    | 34.39     | 22.14       | 32.41 | Huang et al. 2021 <sup>[17]</sup> |
| PU           | -        | 2019      | Canister-GC-MS                | 4           | 106         | 3.00                          | 0.00    | 40.14     | 4.86        | 52.11 | Ma et al. 2020 <sup>[19]</sup>    |
| PF           |          | 2018–2019 | Canister-GC-MS                | 148         | 107         | 10.16                         | 0.00    | 20.16     | 29.25       | 40.71 | Huang et al. 2021 <sup>[17]</sup> |
| PF           | -        | -         | Canister-GC-MS/FID            | -           | 108         | 2.33                          | 0.00    | 57.24     | 3.71        | 36.73 | Zhang et al. 2021 <sup>[20]</sup> |
| PF           | -        | 2019      | Canister-GC-MS                | 4           | 106         | 4.01                          | 0.00    | 96.45     | 0.00        | 0.00  | Ma et al. 2020 <sup>[19]</sup>    |
| PET          | -        | 2019      | Canister-GC-MS                | 4           | 106         | 2.92                          | 0.98    | 5.18      | 3.24        | 87.06 | Ma et al. 2020 <sup>[19]</sup>    |
| PC           | -        | 2019      | Canister-GC-MS                | 4           | 106         | 24.23                         | 2.92    | 0.00      | 71.85       | 1.31  | Ma et al. 2020 <sup>[19]</sup>    |
| PC           |          | 2018–2019 | Canister-GC-MS                | 148         | 107         | 49.62                         | 7.51    | 10.67     | 28.86       | 2.37  | Huang et al. 2021 <sup>[17]</sup> |
| ER           | -        | 2019      | Canister-GC-MS                | 4           | 106         | 0.00                          | 0.00    | 55.23     | 0.98        | 30.10 | Ma et al. 2020 <sup>[19]</sup>    |
| CR           | -        | 2019      | Canister-GC-MS                | 4           | 106         | 1.34                          | 0.00    | 46.29     | 0.98        | 50.82 | Ma et al. 2020 <sup>[19]</sup>    |
| AR           | -        | 2019      | Canister-GC-MS                | 4           | 106         | 64.32                         | 15.86   | 2.27      | 0.98        | 9.07  | Ma et al. 2020 <sup>[19]</sup>    |
| ABS          | -        | 2019      | Canister-GC-MS                | 4           | 106         | 1.14                          | 12.96   | 74.44     | 1.95        | 9.71  | Ma et al. 2020 <sup>[19]</sup>    |
| ABS          | YRD      | -         | Canister-GC-                  | 25          | 61          | 17.48                         | 5.56    | 55.56     | 21.76       | 0.00  | Mo et al. 2015 <sup>[2]</sup>     |

|     |               |      |                                  |     |     |       |      |       |       |       |                                      |
|-----|---------------|------|----------------------------------|-----|-----|-------|------|-------|-------|-------|--------------------------------------|
| FR  | -             | -    | MS/FID<br>Canister-GC-<br>MS/FID | -   | 108 | 14.39 | 0.00 | 25.25 | 1.35  | 59.01 | Zhang et al.<br>2021 <sup>[20]</sup> |
| SBP | Chengdu       | -    | Canister-GC-MS                   | 22  | 37  | 0.00  | 0.00 | 45.31 | 0.00  | 19.83 | Zhou et al,<br>2019 <sup>[21]</sup>  |
| SBP | Chengdu       | -    | Canister-GC-MS                   | 22  | 37  | 0.00  | 0.00 | 60.55 | 0.00  | 31.54 | Zhou et al,<br>2019 <sup>[21]</sup>  |
| SBP | East<br>China | 2017 | Canister-GC-MS                   | 12  | 106 | 0.00  | 0.00 | 81.80 | 1.50  | 12.01 | Wu et al,2020 <sup>[22]</sup>        |
| SBP | -             | -    | GC-MS                            | 183 |     | 0.11  | 0.00 | 79.03 | 0.00  | 18.39 | Ke et al, 2020 <sup>[23]</sup>       |
| WBP | East<br>China | 2017 | Canister-GC-MS                   | 12  | 106 | 0.00  | 0.00 | 12.05 | 12.01 | 76.28 | Wu et al,2020 <sup>[22]</sup>        |
| WBP | -             | -    | GC-MS                            | 183 | -   | 3.78  | 0.00 | 6.11  | 0.00  | 85.42 | Ke et al, 2020 <sup>[23]</sup>       |
| UVP | -             | -    | GC-MS                            | 183 | -   | 1.38  | 0.00 | 2.49  | 0.00  | 96.14 | Ke et al, 2020 <sup>[23]</sup>       |
| WBI | -             | -    | GC-MS                            | 183 | -   | 2.05  | 0.00 | 5.61  | 0.00  | 89.21 | Ke et al, 2020 <sup>[23]</sup>       |
| WBI | China         | -    | -                                | 4   | 212 | 5.00  | 0.00 | 6.50  | 0.00  | 63.00 | Liang et al,<br>2020 <sup>[7]</sup>  |
| UVI | -             | -    | GC-MS                            | 183 | -   | 1.83  | 0.00 | 0.00  | 0.00  | 46.47 | Ke et al, 2020 <sup>[23]</sup>       |



Table S6 The mass fraction of chemical groups of merged profiles for chemical industry. (Unit: %)

| Profile name | Alkanes | Alkenes | Aromatic | Halocarbons | OVOCs |
|--------------|---------|---------|----------|-------------|-------|
| ETH          | 21.24   | 37.35   | 15.54    | 8.22        | 17.65 |
| BEN          | 0.00    | 0.00    | 100.00   | 0.00        | 0.00  |
| EBEN         | 0.00    | 0.00    | 100.00   | 0.00        | 0.00  |
| BUT          | 11.11   | 88.89   | 0.00     | 0.00        | 0.00  |
| STY          | 0.00    | 0.00    | 100.00   | 0.00        | 0.00  |
| PVC          | 11.32   | 0.00    | 0.00     | 88.68       | 0.00  |
| PS           | 2.91    | 3.55    | 82.48    | 1.98        | 9.08  |
| PPG          | 0.10    | 0.26    | 7.31     | 14.43       | 77.90 |
| PP           | 21.94   | 34.17   | 6.18     | 17.16       | 20.55 |
| PE           | 44.75   | 22.49   | 7.50     | 7.50        | 17.76 |
| SISR         | 85.84   | 0.00    | 1.00     | 1.03        | 12.13 |
| SEBSR        | 72.73   | 0.00    | 1.92     | 2.65        | 22.70 |
| SBR          | 58.31   | 1.16    | 36.54    | 0.14        | 3.85  |
| ERP          | 21.57   | 28.77   | 10.64    | 2.76        | 36.26 |
| EPDM         | 22.38   | 9.76    | 8.48     | 49.62       | 9.76  |
| PU           | 6.13    | 1.57    | 36.97    | 13.39       | 41.93 |
| PF           | 4.63    | 0.00    | 48.84    | 13.89       | 32.63 |
| PET          | 2.93    | 0.98    | 5.22     | 3.26        | 87.61 |
| PC           | 35.16   | 4.97    | 10.16    | 47.95       | 1.75  |
| ER           | 0.00    | 0.00    | 63.99    | 1.13        | 34.88 |
| CR           | 1.34    | 0.00    | 46.56    | 0.98        | 51.11 |
| AR           | 69.54   | 17.15   | 2.46     | 1.06        | 9.80  |
| ABS          | 8.85    | 8.81    | 61.83    | 11.28       | 9.24  |
| FR           | 14.39   | 0.00    | 25.25    | 1.35        | 59.01 |
| SBP          | 0.12    | 0.00    | 75.14    | 1.69        | 23.04 |
| WBP          | 3.58    | 0.00    | 8.59     | 11.36       | 76.47 |
| UVP          | 1.38    | 0.00    | 2.49     | 0.00        | 96.13 |
| WBI          | 4.11    | 0.00    | 7.07     | 0.00        | 88.82 |
| UVI          | 3.79    | 0.00    | 0.00     | 0.00        | 96.21 |

## References

1. Wei, W.; Cheng, S.; Li, G.; Wang, G.; Wang, H. Characteristics of volatile organic compounds (VOCs) emitted from a petroleum refinery in Beijing, China. *Atmospheric Environment* 2014, 89, 358–366.
2. Mo, Z.; Shao, M.; Lu, S.; Qu, H.; Zhou, M.; Sun, J.; Gou, B. Process-specific emission characteristics of volatile organic compounds (VOCs) from petrochemical facilities in the Yangtze River Delta, China. *Science of the Total Environment* 2015, 533, 422–431.
3. Qi, Y. Emission characteristic and environmental impact analysis of volatile organic compounds (VOCs) in petrochemical industry. Master, Shandong University, Shandong, 2018.
4. Shen, L.; Xiang, P.; Liang, S.; Chen, W.; Wang, M.; Lu, S.; Wang, Z. Sources Profiles of Volatile Organic Compounds (VOCs) Measured in a Typical Industrial Process in Wuhan, Central China. *Atmosphere* 2018, 9, 297.
5. Yang, Y.; Yang, J.; Yin, S.; Yu, Y.; Zheng, J.; Mo, Z. Speciated VOCs Emission Inventory and Key Species from Printing Industry in the Pearl River Delta Region. *Research of Environmental Sciences* 2013, 26, 326–333.
6. Xie, Y.; Zheng, X.; Liu, C. Source Profiles and Ozone Formation Potential of Volatile Organic Compounds from Printing Industry in Nanjing. *Environmental Science and Technology* 2018, 31, 64–67.
7. Liang, X.; Sun, X.; Xu, J.; Ye, D. Improved emissions inventory and VOCs speciation for industrial OFP estimation in China. *Science of the Total Environment* 2020, 745, 473.
8. Zhong, Z.; Sha, Q.; Zheng, J.; Yuan, Z.; Gao, Z.; Ou, J.; Zheng, Z.; Li, C.; Huang, Z. Sector-based VOCs emission factors and source profiles for the surface coating industry in the Pearl River Delta region of China. *Science of the Total Environment* 2017, 583, 19–28.
9. Fang, L.; Liu, W.-w.; Chen, D.-n.; Li, G.H.; Wang, D.; Shao, X.; Nie, L. Source Profiles of Volatile Organic Compounds (VOCs) from Typical Solvent-based Industries in Beijing. *Environmental Science* 2019, 40, 4395–4403.
10. Zhai, Z.; Meng, H.; Wang, H.; Zhai, Y.C.; Cao, Y.; Zou, K.H. Emission Characteristics and Characteristic Substance Identification of Volatile Odorous Organic Compounds in Industries Using Organic Solvents. *Huanjing kexue* 2018, 39, 3557–3562.
11. Zhang, Y.; Li, C.; Yan, Q.; Han, S.; Zhao, Q.; Yang, L.; Liu, Y.; Zhang, R. Typical industrial sector-based volatile organic compounds source profiles and ozone formation potentials in Zhengzhou, China. *Atmospheric Pollution Research* 2020, 11, 841–850.
12. Gao, Z. Source characteristics of VOC emissions from typical industrial painting sources. Master, South China University of Technology Guangzhou, 2015.
13. Wu, R.; Xie, S. Spatial Distribution of Secondary Organic Aerosol Formation Potential in China Derived from Speciated Anthropogenic Volatile Organic Compound Emissions. *Environmental Science & Technology* 2018, 52, 8146–8156.
14. Wang, J.; Jin, D.; Gu, Z.; Lu, J.H.; Ye, Z.P.; Dong, S.B. The VOCs emission characteristics of metal surface coating industry and its emission factors. *China Environ. Sci.* 2020, 40, 1940–1945.
15. Teng, F.; Miu, X.; Xiong, M.; Zhao, N.; Jin, D.J.; He, L.; Zhang, Q.Y.; Dong, S.B. Component characteristics and emission coefficient of VOCs from ship manufacturing and repairing industry in Zhenjiang Province. *Environ. Pollut. Control.* 2022, 44, 476–480+505.
16. Wang, R.; Yuan, Z.; Zheng, J.; Li, C.; Huang, Z.; Li, W.; Xie, Y.; Wang, Y.; Yu, K.; Duan, L. Characterization of VOC emissions from construction machinery and river. *J. Environ. Sci.* 2020, 96, 138–150.
17. Huang, Y.Y.; Xiu, G.; Lu, Y.; Gao, S.; Li, L.; Chen, L.; Huang, Q.; Yang, Y.; Che, X.; Chen, X.; Fu, Q. Application of an emission profile-based method to trace the sources of volatile organic compounds in a chemical industrial park. *The Science of the total environment* 2021, 768, 144694.
18. Zhao, Y.; Mao, P.; Zhou, Y.; Yang, Y.; Zhang, J.; Wang, S.; Dong, Y.; Xie, F.; Yu, Y.; Li, W. Improved provincial emission inventory and speciation profiles of anthropogenic non-methane volatile organic compounds: a case study for Jiangsu, China. *Atmospheric Chemistry & Physics* 2017, 17, 7733–7756.
19. Ma, Y.; Gao, S.; Wang, Q.; Cui, H.; Wu, S.; Fu, Q.; Duan, Y.; Wu, J.; Jiao, Z. Source profiles and impact of volatile organic compounds in the synthetic resin industry. *China Environmental Science* 2020, 40, 3268–3274.
20. Zhang, L.; Zhu, X.; Wang, Z.; Zhang, J.; Liu, X.; , Y.Z. Improved speciation profiles and estimation methodology for VOCs emissions: A case study in two chemical plants in eastern China. *Environmental pollution* 2021, 291, 118192.
21. Zhou, Z.; Deng, Y.; Wu, K.; Tan, Q.W.; Zhou, X.L.; Song, D.L.; Huang, F.X.; Zeng, W.H. Source profiles of VOCs associated with typical industrial processes in Chengdu. *Huanjing kexue* 2019, 40, 3949–3961.
22. Wu, J.; Gao, S.; Chen, X.; Yang, Y.; Fu, Q.Y.; Che, X.; Jiao, Z. Source Profiles and Impact of Volatile Organic Compounds in the Coating Manufacturing Industry. *Huanjing kexue* 2020, 41, 1582–1588.
23. Ke, Y.; Sun, Y.; Cheng, H.; Liu, R.Y.; Huang, H.M.; Fan, Y.L.; Q., Y. Characteristics of Volatile Organic Compounds in Wood Coatings and Automotive Coatings in China. *Huanjing kexue* 2020, 41, 4446–4454.
